# Supplementary material
Source: PubMed Central journal article supplement (PMC3931012)

**A**

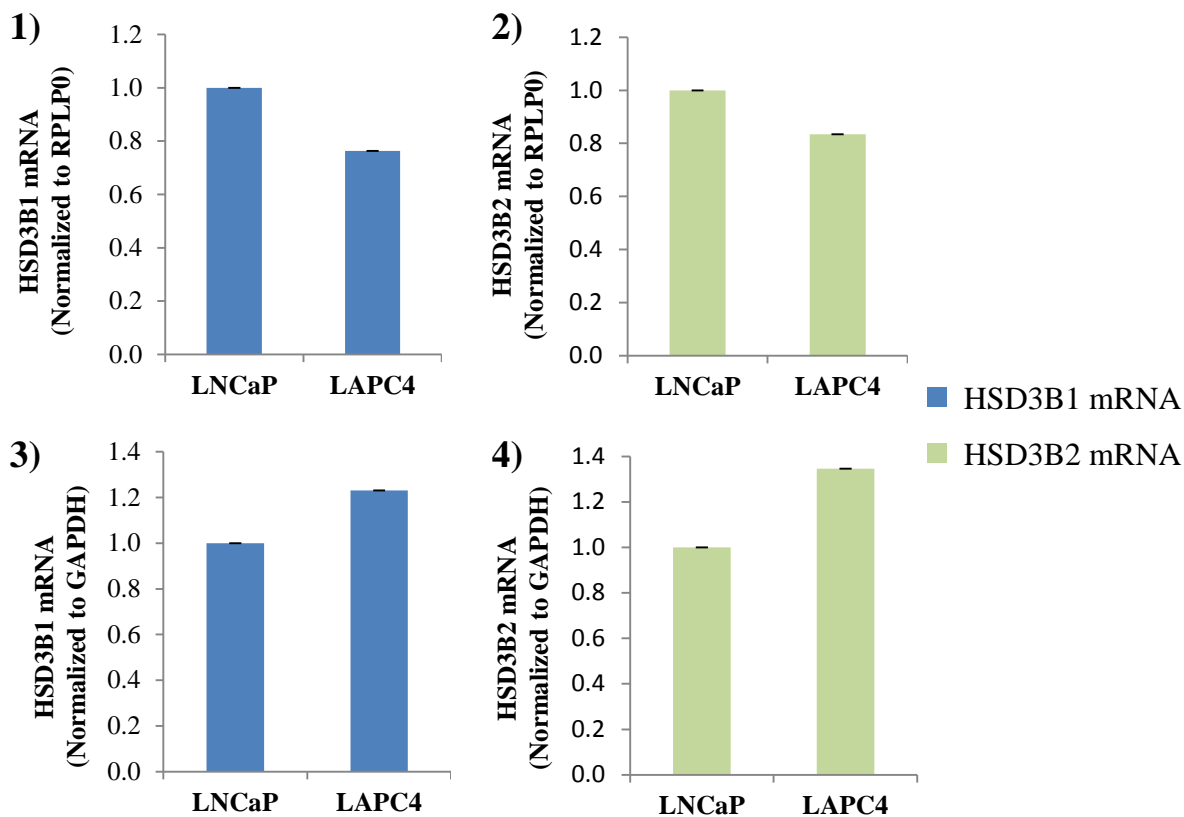

**B**

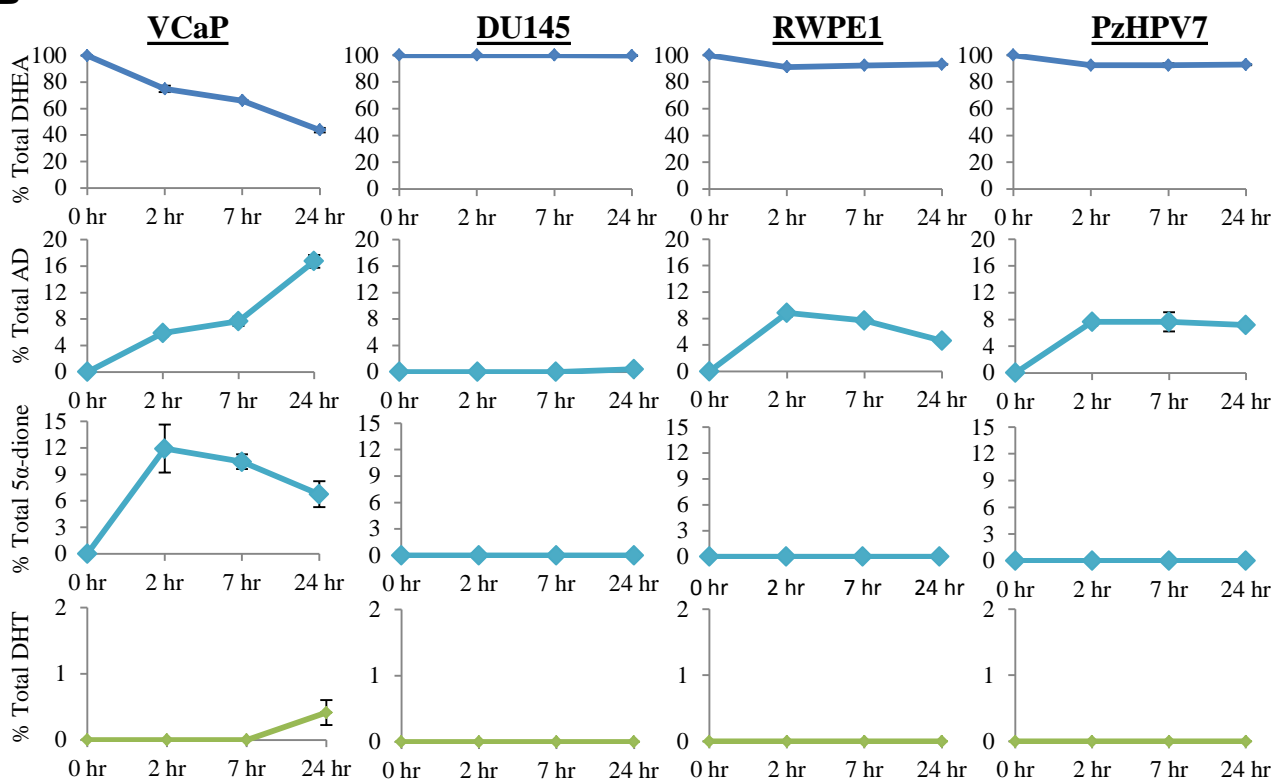

**A**

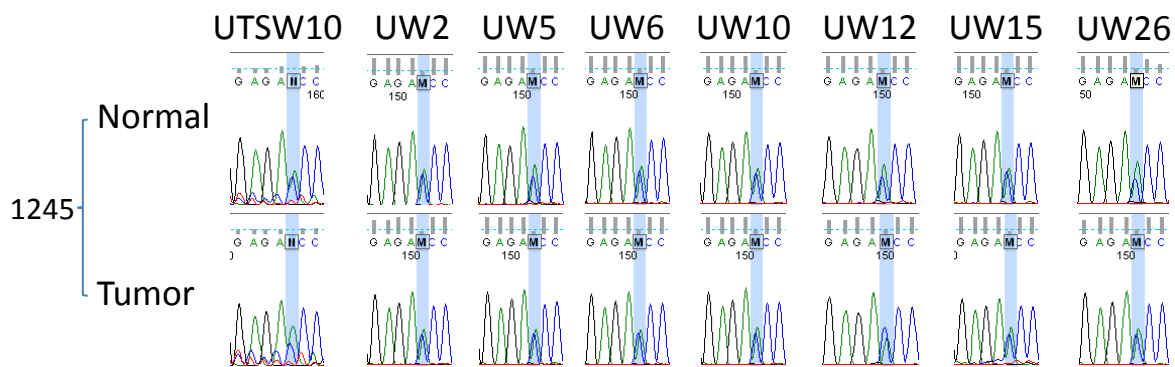

**B**

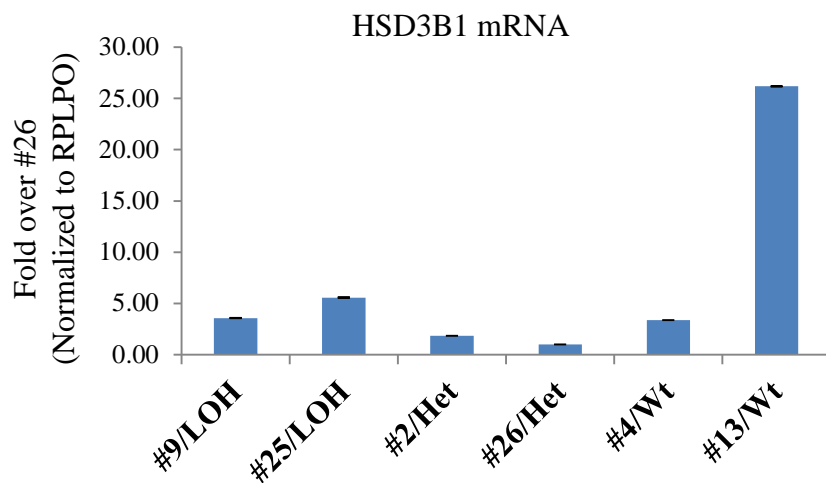

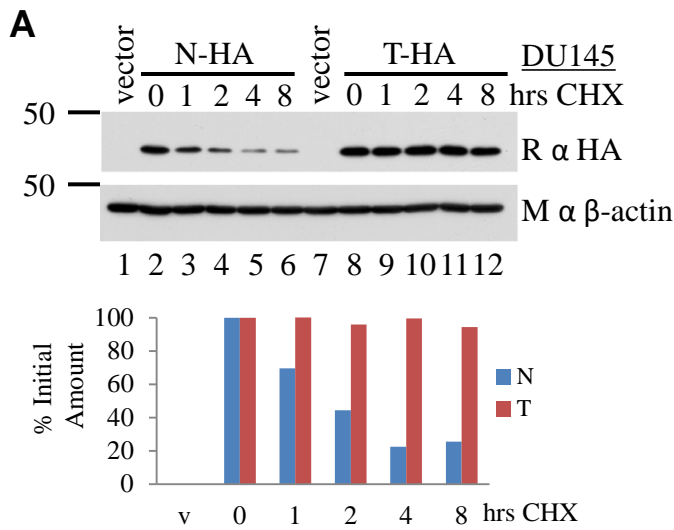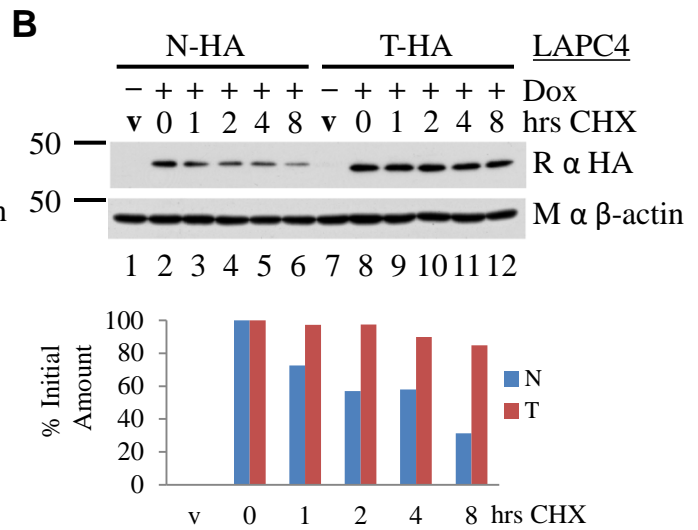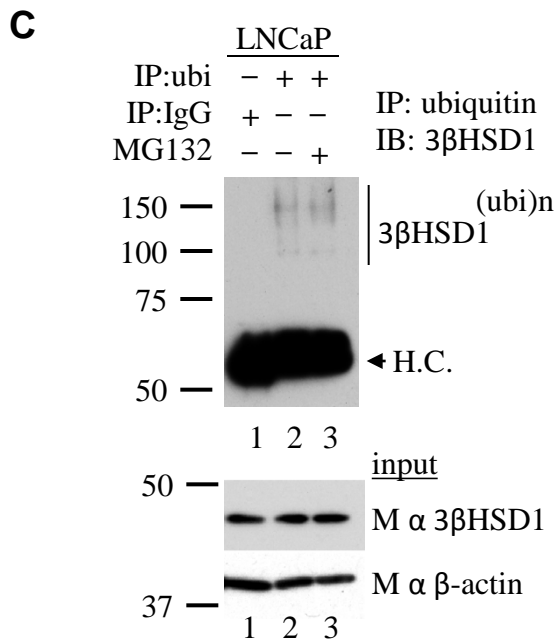

Supplement: NIHMS510042-supplement-02.pdf [file NIHMS510042-supplement-02.pdf]
